# Supplementary material for: neo4jsbml: import systems biology markup language data into the graph database Neo4j
Source: PeerJ journal article supplement (doi:10.7717/peerj.16726), 2024-01-16
Supplement: supplementary_table_s1.pdf [file supplementary_table_s1.pdf]

## **neo4jsbml: import Systems Biology Markup Language data into the graph database Neo4j**

Guillaume Gricourt<sup>1</sup>, Thomas Duigou<sup>1</sup>, Sandra Dérozier<sup>2</sup>, and Jean-Loup Faulon<sup>1</sup>

<sup>1</sup> MICALIS, INRAE, Domaine de Vilvert, Jouy-en-Josas, 78352, France

<sup>2</sup> MaIAGE, INRAE, Domaine de Vilvert, Jouy-en-Josas, 78352, France

### **Supplementary Table S1**

Current status of SBML packages according to the SBML webpage <sup>1</sup>. Status indicated as available are in green, in progress or in development are in orange, and those which are not available are in red.

| <b>Package</b>                                          | <b>Description</b>                                                                                                                          | <b>Status Specifications</b> | <b>Status Libsbml</b> | <b>Status neo4jsbml</b> |
|---------------------------------------------------------|---------------------------------------------------------------------------------------------------------------------------------------------|------------------------------|-----------------------|-------------------------|
| Arrays                                                  | Support for expressing arrays of things                                                                                                     |                              |                       |                         |
| Hierarchical Model Composition                          | Supports the creation of models from other complete models or from model fragments                                                          |                              |                       |                         |
| Distributions                                           | Support for encoding models that sample values from statistical distributions                                                               |                              |                       |                         |
| Dynamic Structures                                      | Support for creating and destroying entities during a simulation                                                                            |                              |                       |                         |
| Flux Balance Constraints                                | Support for constraint-based (a.k.a. steady-state) models                                                                                   |                              |                       |                         |
| Groups                                                  | A means for grouping elements                                                                                                               |                              |                       |                         |
| Layout                                                  | Support for storing the spatial topology of a network diagram; adjunct to the render package                                                |                              |                       |                         |
| Extended MathML                                         | A suite of packages that collectively allow MathML beyond the subset allowed in SBML core                                                   |                              |                       |                         |
| Multistate, Multicomponent and Multicompartment Species | Object structures for representing entity pools with multiple states and composed of multiple components, and reaction rules involving them |                              |                       |                         |

|                    |                                                                                                                     |  |  |  |
|--------------------|---------------------------------------------------------------------------------------------------------------------|--|--|--|
| Qualitative models | Support for models wherein species do not represent quantity of matter & processes are not reactions per se         |  |  |  |
| Rendering          | Support for defining the graphical symbols and glyphs used in a diagram of the model; adjunct to the layout package |  |  |  |
| Spatial Processes  | Support for describing processes that involve a spatial component, and describing the geometries involved           |  |  |  |

(1) *SBML.org: SBML Specifications*. SBML.org. <http://sbml.org/documents/specifications/> (accessed 2023-10-11).
